# Supplementary material
Source: Elsevier journal article supplement (https://comptes-rendus.academie-sciences.fr/geoscience/article/10.1016/j.crte.2015.02.006/file/attach/mmc3.pdf)

NOAA HYSPLIT MODEL  
 Backward trajectories ending at 1300 UTC 21 Oct 13  
 GDAS Meteorological Data

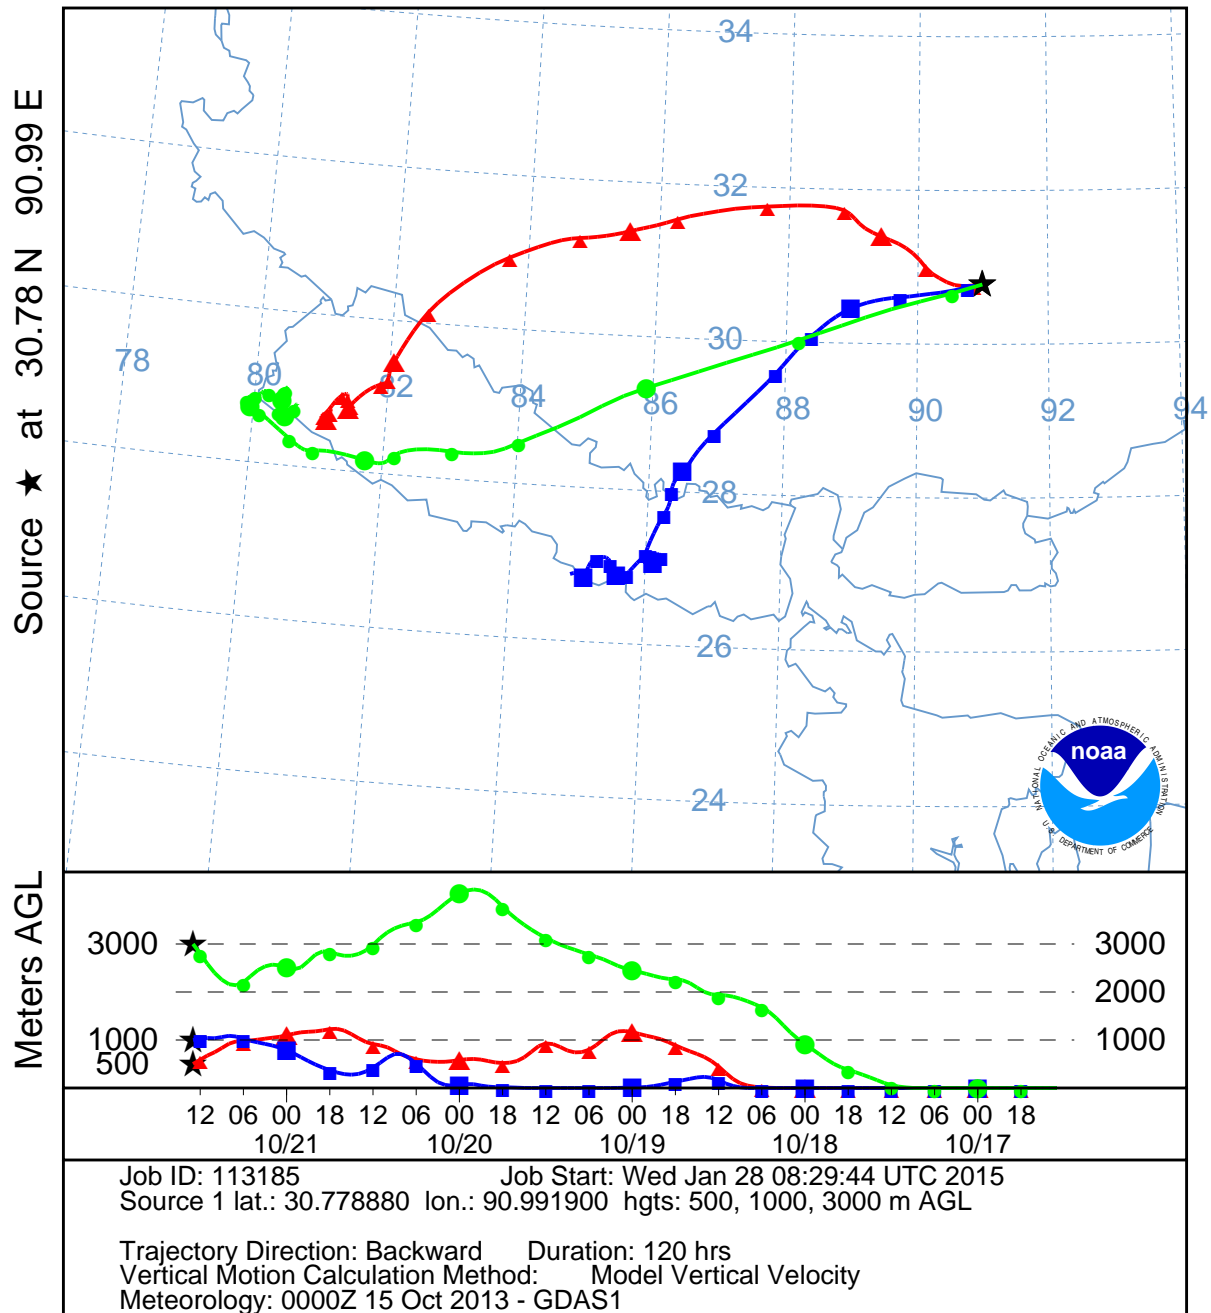

Supplement: mmc3 [file mmc3.pdf]
